# Supplementary material for: Development of simple random mutagenesis protocol for the protein expression system in Pichia pastoris
Source: PubMed Central journal article supplement (PMC5028916; doi:10.1186/s13068-016-0613-z), 2016-09-19
Supplement: 13068_2016_613_MOESM1_ESM.pdf [file 13068_2016_613_MOESM1_ESM.pdf]

1 **Additional supporting files**

2 Development of simple random mutagenesis protocol for the protein expression system in *Pichia*

3 *pastoris*

4 Mikako Tachioka, Naohisa Sugimoto<sup>†</sup>, Akihiko Nakamura<sup>‡</sup>, Naoki Sunagawa, Takuya Ishida, Taku

5 Uchiyama, Kiyohiko Igarashi and Masahiro Samejima<sup>\*</sup>

6

7 This PDF file includes: Tables, Figures

## 8 Tables

9 **Table S1. Summary of Illumina sequencing data.**

| Template (pg)         | 50            |             |               | 100           |               |               |
|-----------------------|---------------|-------------|---------------|---------------|---------------|---------------|
| Mn <sup>2+</sup> (mM) | 0             | 1           | 2             | 0             | 1             | 2             |
| Total reads           | 35,875,408    | 8,081,358   | 20,091,380    | 35,926,976    | 14,462,094    | 35,999,440    |
| Average length        | 68.0          | 70.6        | 72.4          | 72.1          | 71.7          | 72.4          |
| Total bases           | 2,440,638,535 | 570,099,258 | 1,453,831,528 | 2,588,644,474 | 1,036,793,040 | 2,606,169,302 |
| P20 bases*            | 2,424,785,994 | 561,139,723 | 1,434,160,167 | 2,554,169,451 | 1,021,406,344 | 2,572,067,857 |
| Average quality       | 37.9          | 36.8        | 37.0          | 37.0          | 36.8          | 37.0          |
| Properly mapped reads | 34,603,742    | 7,736,880   | 19,299,884    | 34,705,958    | 14,081,476    | 34,769,850    |

10

| Template (pg)         | 250         |               |               | 500           |               |               |
|-----------------------|-------------|---------------|---------------|---------------|---------------|---------------|
| Mn <sup>2+</sup> (mM) | 0           | 1             | 2             | 0             | 1             | 2             |
| Total reads           | 9,715,804   | 20,914,728    | 20,091,380    | 38,542,866    | 19,903,026    | 22,455,500    |
| Average length        | 73.4        | 72.4          | 72.4          | 68.5          | 71.6          | 73.1          |
| Total bases           | 713,374,274 | 1,514,941,723 | 1,453,831,528 | 2,640,727,717 | 1,424,643,642 | 1,641,096,327 |
| P20 bases*            | 701,306,322 | 1,494,428,155 | 1,434,160,167 | 2,622,966,123 | 1,404,115,470 | 1,619,650,927 |
| Average quality       | 36.2        | 37.0          | 37.0          | 37.9          | 36.8          | 37.1          |
| Properly mapped reads | 9,547,646   | 20,252,516    | 19,299,884    | 37,095,176    | 19,533,650    | 21,664,400    |

11

\* P20 bases represents the total bases whose Phred Quality Scores were more than 2

12 **Table S2. Averaged mutation frequency in *cel6A* (50 pg template).** Averaged mutation frequency  
 13 (numbers on left side of each column) was calculated by averaging the mutation frequency at each  
 14 reference base. Percentage of total mutations in *cel6A* is shown in parentheses.

| Template (pg)                                        | 50                 |              |                    |              |                    |              |
|------------------------------------------------------|--------------------|--------------|--------------------|--------------|--------------------|--------------|
| Mn <sup>2+</sup> (mM)                                | 0                  |              | 1                  |              | 2                  |              |
| Total bases (Maximum)                                | 697,971            |              | 1,250,127          |              | 782,970            |              |
| Total bases (Minimum)                                | 162,764            |              | 250,735            |              | 11,583             |              |
| <b>Averaged mutation frequency (kb<sup>-1</sup>)</b> |                    |              |                    |              |                    |              |
| <b>Total (<i>cel6A</i>)</b>                          | <b>0.85 ± 0.56</b> |              | <b>1.55 ± 1.40</b> |              | <b>1.98 ± 1.76</b> |              |
| <b>Transitions</b>                                   | <b>0.31</b>        | <b>(36%)</b> | <b>0.74</b>        | <b>(52%)</b> | <b>0.66</b>        | <b>(32%)</b> |
| A to G                                               | 0.30               | (7%)         | 0.37               | (5%)         | 0.69               | (7%)         |
| T to C                                               | 0.38               | (9%)         | 0.40               | (5%)         | 0.87               | (9%)         |
| G to A                                               | 0.30               | (9%)         | 1.28               | (21%)        | 0.57               | (7%)         |
| C to T                                               | 0.27               | (12%)        | 0.91               | (21%)        | 0.50               | (9%)         |
| <b>Transversions</b>                                 | <b>0.26</b>        | <b>(62%)</b> | <b>0.35</b>        | <b>(47%)</b> | <b>0.70</b>        | <b>(68%)</b> |
| A to T                                               | 0.23               | (5%)         | 0.31               | (4%)         | 0.49               | (5%)         |
| T to A                                               | 0.20               | (5%)         | 0.24               | (3%)         | 0.41               | (4%)         |
| A to C                                               | 0.35               | (8%)         | 0.36               | (5%)         | 1.47               | (14%)        |
| T to G                                               | 0.24               | (6%)         | 0.26               | (3%)         | 0.91               | (9%)         |
| G to C                                               | 0.21               | (6%)         | 0.23               | (4%)         | 0.51               | (6%)         |
| C to G                                               | 0.16               | (7%)         | 0.17               | (4%)         | 0.36               | (7%)         |
| G to T                                               | 0.36               | (11%)        | 0.67               | (11%)        | 0.74               | (9%)         |
| C to A                                               | 0.36               | (15%)        | 0.59               | (14%)        | 0.70               | (13%)        |
| <b>Insertions, Deletions</b>                         | <b>0.01</b>        | <b>(2%)</b>  | <b>0.02</b>        | <b>(1%)</b>  | <b>0.02</b>        | <b>(1%)</b>  |
| Transitions/Transversions                            | 0.6                | (0.6)        | 1.1                | (1.1)        | 0.5                | (0.5)        |
| AT to GC/GC to AT                                    | 1.2                | (0.8)        | 0.4                | (0.2)        | 1.5                | (0.9)        |
| A to N, T to N                                       | 1.70               | (39%)        | 1.94               | (24%)        | 4.85               | (47%)        |
| G to N, C to N                                       | 1.08               | (59%)        | 1.65               | (74%)        | 2.32               | (52%)        |

16 **Table S3. Averaged mutation frequency in *cel6A* (100 pg template).** These values were obtained  
 17 according to the legend in Table S2.

| Template (pg)                                        | 100                |              |                    |              |                    |              |
|------------------------------------------------------|--------------------|--------------|--------------------|--------------|--------------------|--------------|
| Mn <sup>2+</sup> (mM)                                | 0                  |              | 1                  |              | 2                  |              |
| Total bases (Maximum)                                | 721,539            |              | 169,952            |              | 782,275            |              |
| Total bases (Minimum)                                | 166,366            |              | 40,510             |              | 14,967             |              |
| <b>Averaged mutation frequency (kb<sup>-1</sup>)</b> |                    |              |                    |              |                    |              |
| <b>Total (<i>cel6A</i>)</b>                          | <b>0.86 ± 0.55</b> |              | <b>2.15 ± 2.08</b> |              | <b>2.60 ± 4.63</b> |              |
| <b>Transitions</b>                                   | <b>0.32</b>        | <b>(37%)</b> | <b>0.77</b>        | <b>(33%)</b> | <b>0.71</b>        | <b>(26%)</b> |
| A to G                                               | 0.30               | (7%)         | 0.80               | (7%)         | 0.68               | (5%)         |
| T to C                                               | 0.39               | (9%)         | 1.10               | (10%)        | 0.87               | (7%)         |
| G to A                                               | 0.31               | (9%)         | 0.68               | (8%)         | 0.82               | (8%)         |
| C to T                                               | 0.28               | (12%)        | 0.48               | (8%)         | 0.46               | (6%)         |
| <b>Transversions</b>                                 | <b>0.27</b>        | <b>(62%)</b> | <b>0.77</b>        | <b>(66%)</b> | <b>0.93</b>        | <b>(72%)</b> |
| A to T                                               | 0.24               | (5%)         | 0.69               | (6%)         | 0.47               | (4%)         |
| T to A                                               | 0.21               | (5%)         | 0.59               | (5%)         | 0.63               | (5%)         |
| A to C                                               | 0.36               | (8%)         | 1.64               | (15%)        | 1.46               | (11%)        |
| T to G                                               | 0.25               | (6%)         | 0.92               | (8%)         | 0.92               | (7%)         |
| G to C                                               | 0.21               | (6%)         | 0.52               | (6%)         | 0.52               | (5%)         |
| C to G                                               | 0.15               | (7%)         | 0.28               | (5%)         | 0.37               | (5%)         |
| G to T                                               | 0.35               | (10%)        | 0.76               | (9%)         | 1.55               | (15%)        |
| C to A                                               | 0.35               | (15%)        | 0.71               | (12%)        | 1.53               | (21%)        |
| <b>Insertions, Deletions</b>                         | <b>0.01</b>        | <b>(1%)</b>  | <b>0.01</b>        | <b>(0%)</b>  | <b>0.04</b>        | <b>(2%)</b>  |
| Transitions/Transversions                            | 0.6                | (0.6)        | 0.5                | (0.5)        | 0.4                | (0.4)        |
| AT to GC/GC to AT                                    | 1.2                | (0.7)        | 1.6                | (1.1)        | 1.2                | (0.8)        |
| A to N, T to N                                       | 1.76               | (40%)        | 5.74               | (52%)        | 5.04               | (37%)        |
| G to N, C to N                                       | 1.07               | (59%)        | 2.28               | (48%)        | 3.97               | (61%)        |



19 **Table S4. Averaged mutation frequency in *cel6A* (250 pg template).** These values were obtained  
 20 according to the legend in Table S2.

| Template (pg)                                        | 250                |              |                    |              |                    |              |
|------------------------------------------------------|--------------------|--------------|--------------------|--------------|--------------------|--------------|
| Mn <sup>2+</sup> (mM)                                | 0                  |              | 1                  |              | 2                  |              |
| Total bases (Maximum)                                | 223,967            |              | 419,288            |              | 433,775            |              |
| Total bases (Minimum)                                | 45,307             |              | 105,653            |              | 6,415              |              |
| <b>Averaged mutation frequency (kb<sup>-1</sup>)</b> |                    |              |                    |              |                    |              |
| <b>Total (<i>cel6A</i>)</b>                          | <b>1.32 ± 1.38</b> |              | <b>1.98 ± 1.92</b> |              | <b>2.03 ± 1.84</b> |              |
| <b>Transitions</b>                                   | <b>0.46</b>        | <b>(33%)</b> | <b>0.62</b>        | <b>(29%)</b> | <b>0.63</b>        | <b>(29%)</b> |
| A to G                                               | 0.45               | (7%)         | 0.68               | (7%)         | 0.70               | (7%)         |
| T to C                                               | 0.66               | (10%)        | 0.97               | (10%)        | 0.90               | (9%)         |
| G to A                                               | 0.41               | (8%)         | 0.43               | (5%)         | 0.49               | (6%)         |
| C to T                                               | 0.33               | (9%)         | 0.39               | (7%)         | 0.44               | (8%)         |
| <b>Transversions</b>                                 | <b>0.45</b>        | <b>(66%)</b> | <b>0.73</b>        | <b>(71%)</b> | <b>0.74</b>        | <b>(70%)</b> |
| A to T                                               | 0.43               | (6%)         | 0.46               | (4%)         | 0.50               | (5%)         |
| T to A                                               | 0.29               | (4%)         | 0.37               | (4%)         | 0.41               | (4%)         |
| A to C                                               | 0.84               | (12%)        | 1.58               | (15%)        | 1.53               | (15%)        |
| T to G                                               | 0.48               | (7%)         | 0.89               | (9%)         | 0.94               | (9%)         |
| G to C                                               | 0.23               | (4%)         | 0.56               | (7%)         | 0.53               | (7%)         |
| C to G                                               | 0.12               | (3%)         | 0.34               | (6%)         | 0.38               | (7%)         |
| G to T                                               | 0.61               | (12%)        | 0.84               | (11%)        | 0.81               | (10%)        |
| C to A                                               | 0.61               | (17%)        | 0.81               | (15%)        | 0.81               | (14%)        |
| <b>Insertions, Deletions</b>                         | <b>0.01</b>        | <b>(1%)</b>  | <b>0.01</b>        | <b>(0%)</b>  | <b>0.01</b>        | <b>(1%)</b>  |
| Transitions/Transversions                            | 0.5                | (0.5)        | 0.4                | (0.4)        | 0.4                | (0.4)        |
| AT to GC/GC to AT                                    | 1.5                | (1.0)        | 2.0                | (1.3)        | 1.7                | (1.1)        |
| A to N, T to N                                       | 3.14               | (46%)        | 4.95               | (48%)        | 4.98               | (48%)        |
| G to N, C to N                                       | 1.57               | (53%)        | 2.55               | (51%)        | 2.53               | (52%)        |

22 **Table S5. Averaged mutation frequency in *cel6A* (500 pg template).** These values were obtained  
 23 according to the legend in Table S2.

| Template (pg)                                        | 500                |              |                    |              |                    |              |
|------------------------------------------------------|--------------------|--------------|--------------------|--------------|--------------------|--------------|
| Mn <sup>2+</sup> (mM)                                | 0                  |              | 1                  |              | 2                  |              |
| Total bases (Maximum)                                | 294,496            |              | 463,802            |              | 406,056            |              |
| Total bases (Minimum)                                | 68,363             |              | 4,189              |              | 3,829              |              |
| <b>Averaged mutation frequency (kb<sup>-1</sup>)</b> |                    |              |                    |              |                    |              |
| <b>Total (<i>cel6A</i>)</b>                          | <b>2.07 ± 1.95</b> |              | <b>1.99 ± 1.76</b> |              | <b>2.11 ± 1.92</b> |              |
| <b>Transitions</b>                                   | <b>0.64</b>        | <b>(28%)</b> | <b>0.63</b>        | <b>(29%)</b> | <b>0.72</b>        | <b>(33%)</b> |
| A to G                                               | 0.72               | (7%)         | 0.70               | (7%)         | 0.75               | (7%)         |
| T to C                                               | 1.00               | (9%)         | 0.90               | (9%)         | 0.94               | (9%)         |
| G to A                                               | 0.45               | (5%)         | 0.48               | (6%)         | 0.59               | (7%)         |
| C to T                                               | 0.39               | (7%)         | 0.43               | (8%)         | 0.60               | (10%)        |
| <b>Transversions</b>                                 | <b>0.76</b>        | <b>(71%)</b> | <b>0.73</b>        | <b>(70%)</b> | <b>0.74</b>        | <b>(67%)</b> |
| A to T                                               | 0.48               | (4%)         | 0.50               | (5%)         | 0.54               | (5%)         |
| T to A                                               | 0.39               | (4%)         | 0.41               | (4%)         | 0.43               | (4%)         |
| A to C                                               | 1.65               | (15%)        | 1.44               | (14%)        | 1.54               | (14%)        |
| T to G                                               | 0.93               | (9%)         | 0.95               | (9%)         | 0.96               | (9%)         |
| G to C                                               | 0.58               | (7%)         | 0.54               | (7%)         | 0.57               | (7%)         |
| C to G                                               | 0.37               | (6%)         | 0.37               | (7%)         | 0.39               | (7%)         |
| G to T                                               | 0.86               | (10%)        | 0.82               | (10%)        | 0.75               | (9%)         |
| C to A                                               | 0.85               | (15%)        | 0.78               | (14%)        | 0.72               | (12%)        |
| <b>Insertions, Deletions</b>                         | <b>0.01</b>        | <b>(1%)</b>  | <b>0.01</b>        | <b>(1%)</b>  | <b>0.02</b>        | <b>(1%)</b>  |
| Transitions/Transversions                            | 0.4                | (0.4)        | 0.4                | (0.4)        | 0.5                | (0.5)        |
| AT to GC/GC to AT                                    | 2.0                | (1.3)        | 1.7                | (1.1)        | 1.4                | (0.9)        |
| A to N, T to N                                       | 5.17               | (48%)        | 4.89               | (48%)        | 5.15               | (47%)        |
| G to N, C to N                                       | 2.65               | (51%)        | 2.51               | (52%)        | 2.43               | (52%)        |

25 **Figures**

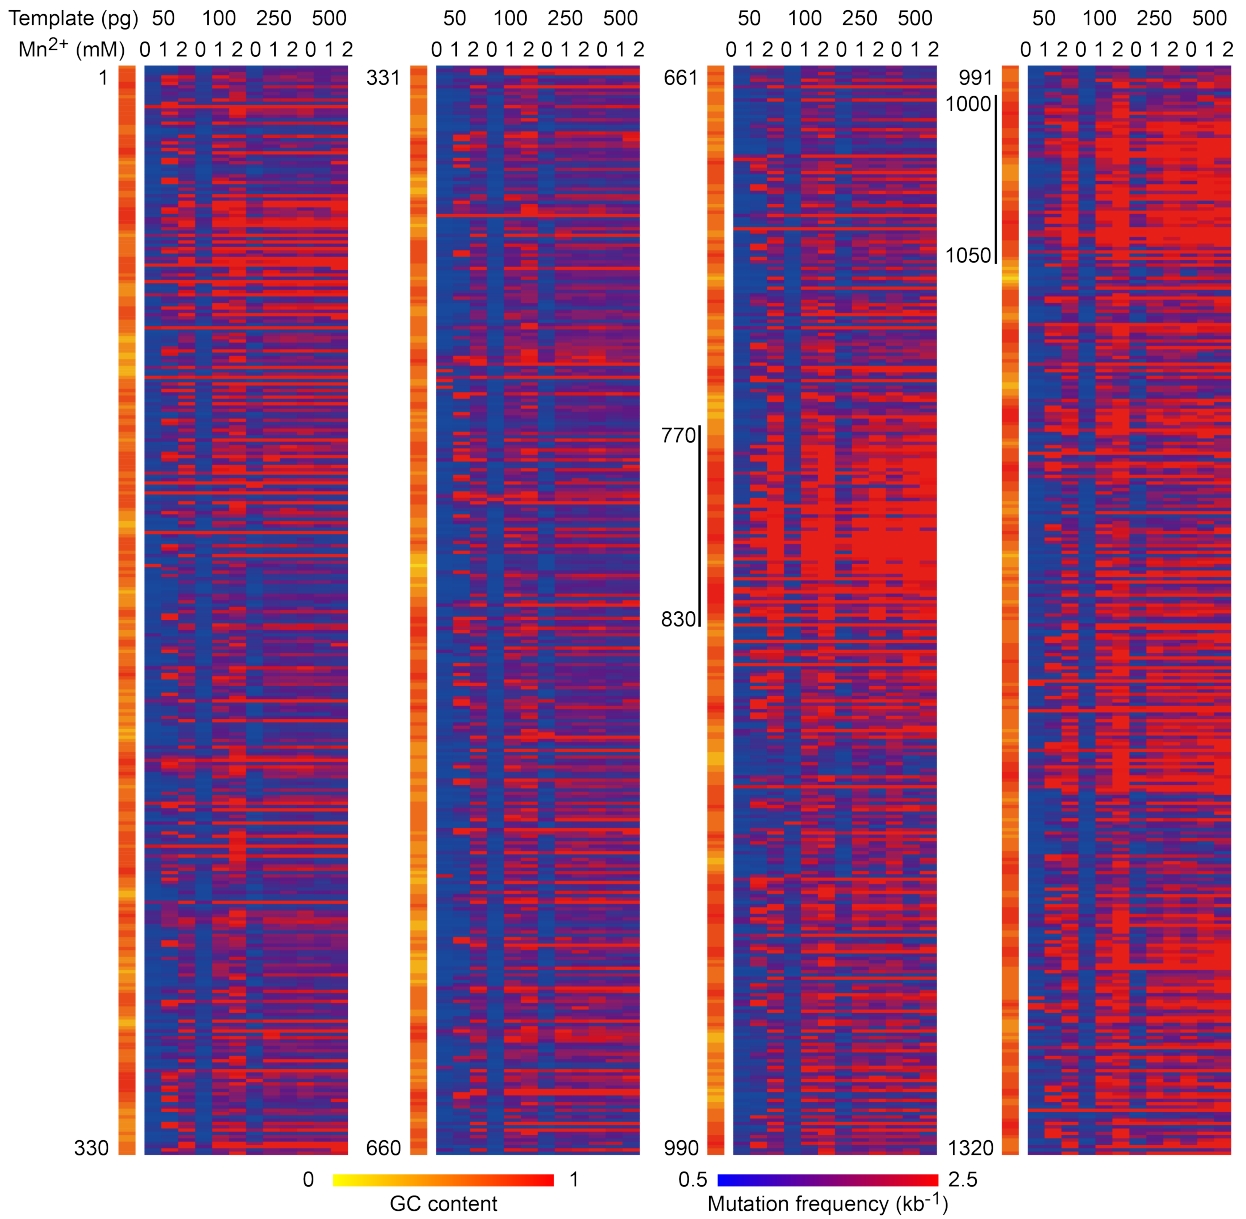

26

27 **Fig. S1. Sequence dependency of mutation frequency.** The mutation frequency of each base in  
 28 *cel6A* (1320 bp) was calculated. The GC content was defined as the percentage of GC in 6 neighbor  
 29 sequences.

30

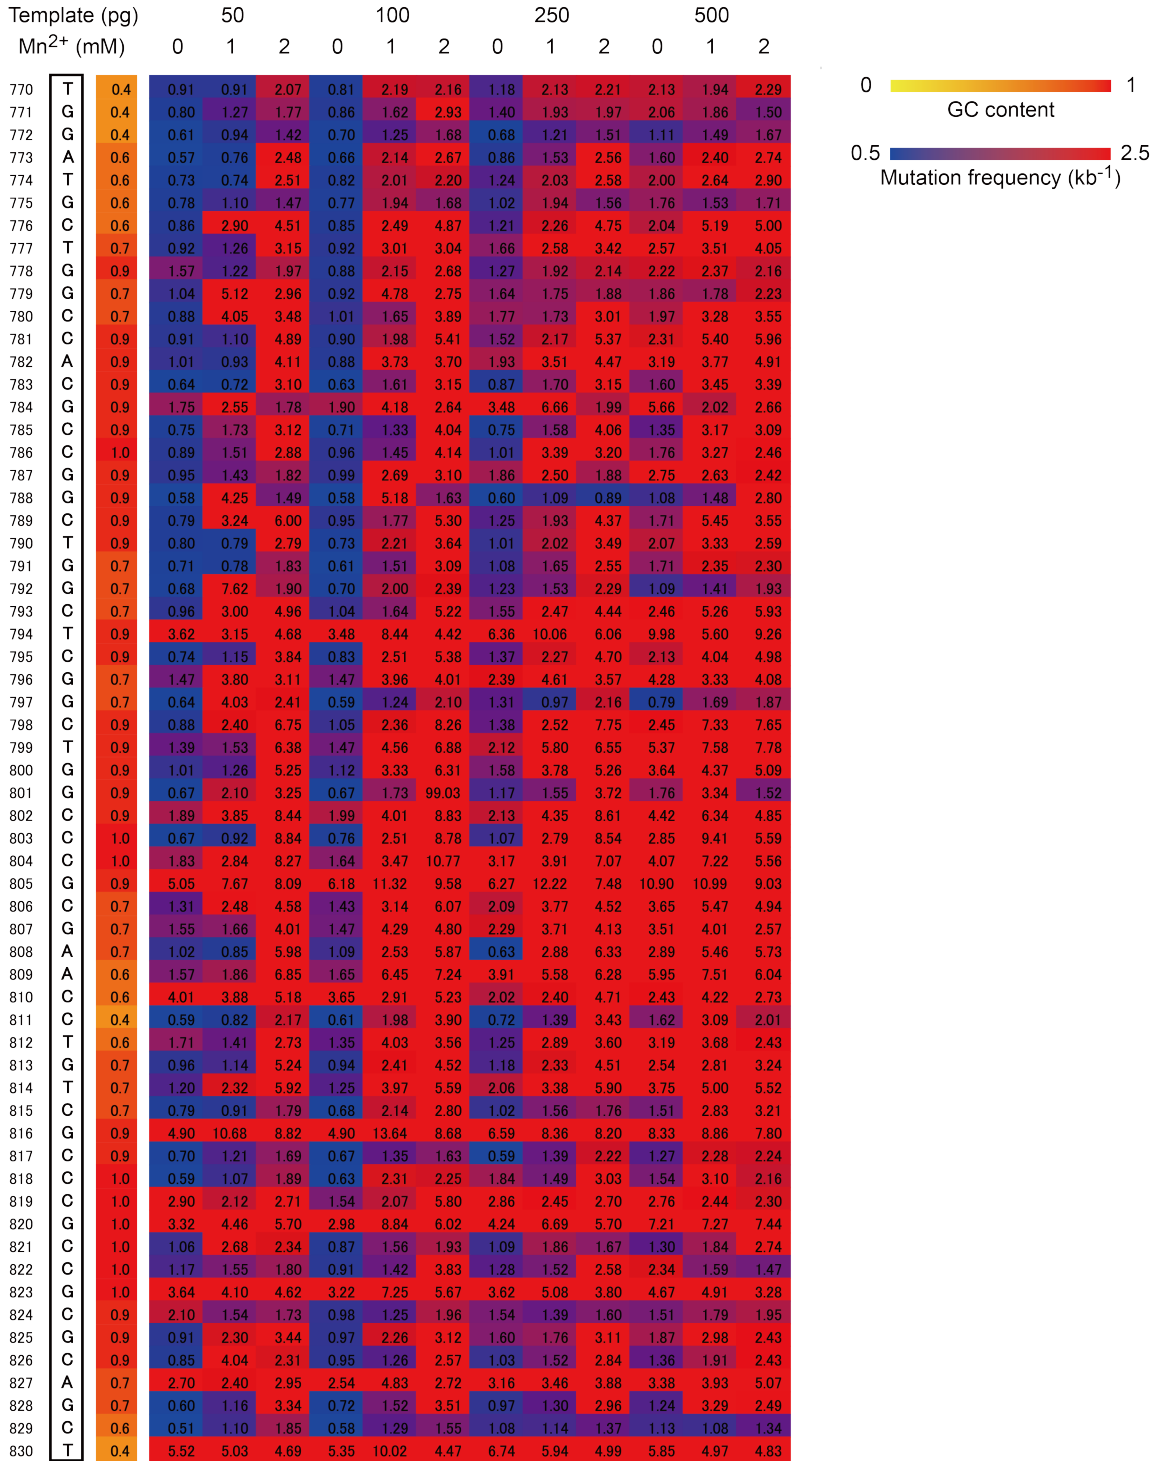

31

32 Fig. S2. Sequence dependency of mutation frequency (enlarged view of Fig. S1, positions 770–  
 33 830).

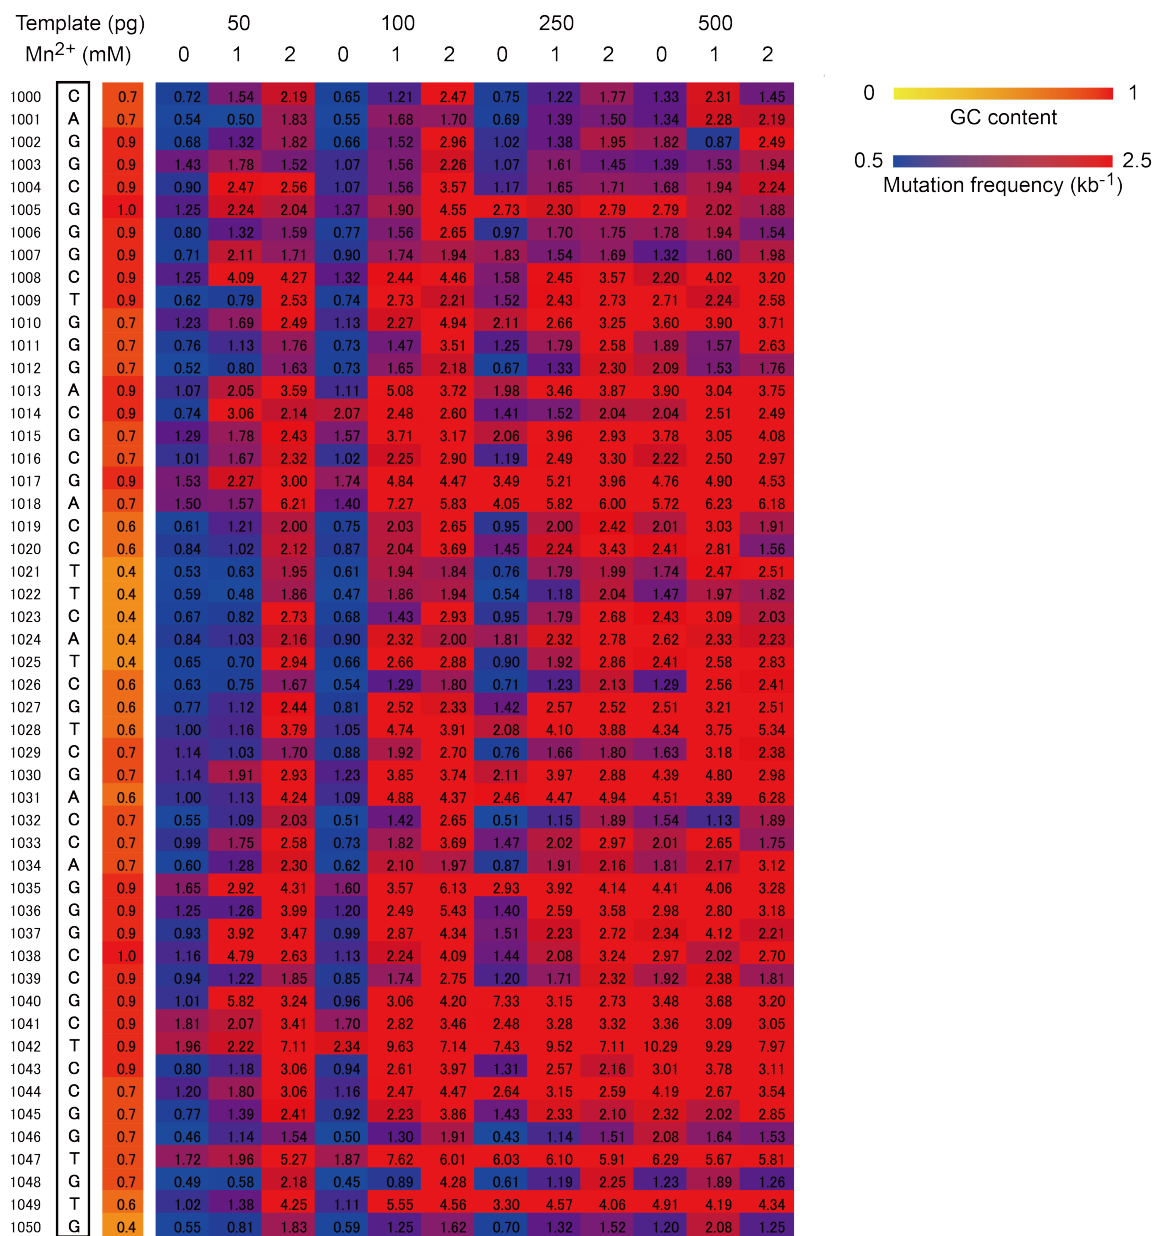

34

35 Fig. S3. Sequence dependency of mutation frequency (enlarged view of Fig. S1, positions 1000–

36 1050).

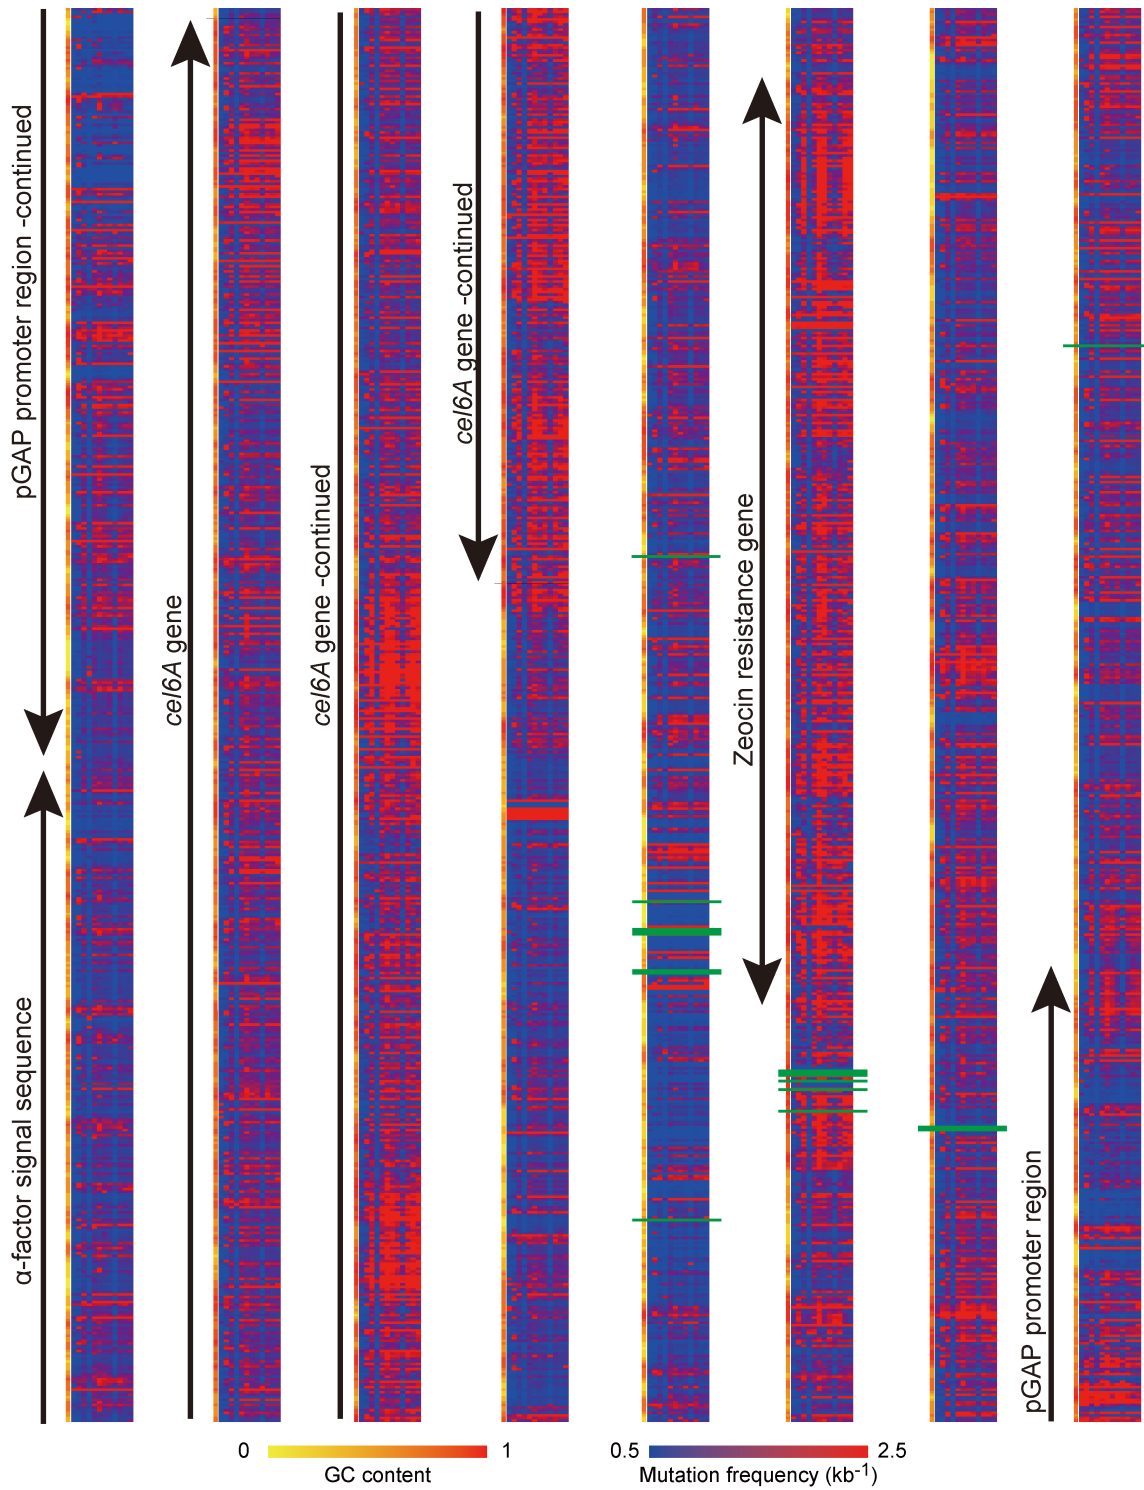

37

38 **Fig. S4. Sequence dependency of mutation frequency (pGAPZ $\alpha$ /cel6A).** The start position of the  
 39 sequence is the restriction site of BlnI. The mutations whose mutation rate was almost 99.9% were  
 40 found in vector regions and indicated by green lines as unrelated mutations.

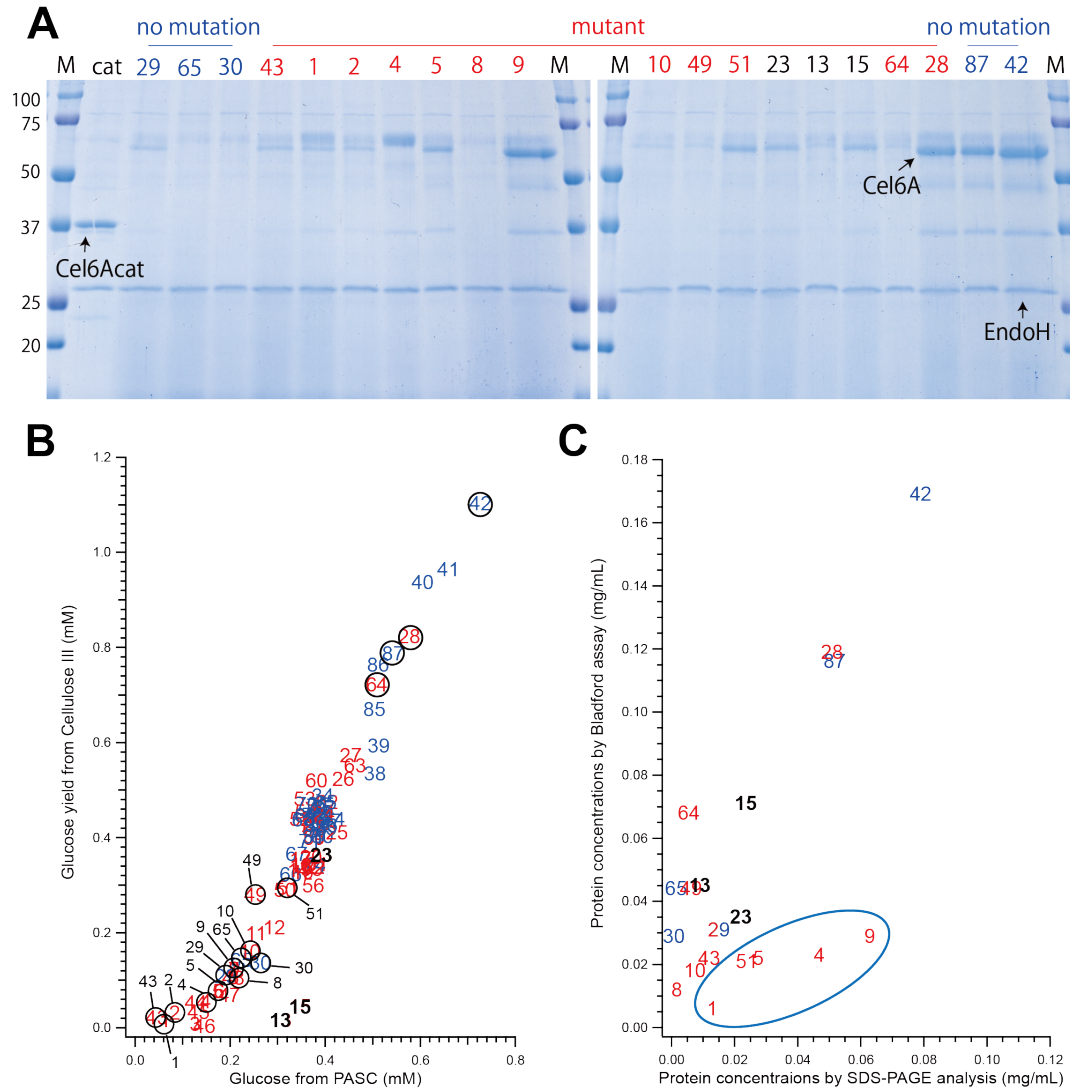

41

42 **Fig. S5. Protein expression levels of transformants.** A) SDS-PAGE of 25  $\mu$ l culture supernatants  
 43 after the digestion with endoglycosidase H and  $\alpha$ -mannosidase. The catalytic domain of *PcCel6A*  
 44 expressed with *GAP* promoter was used as a control. B) Mutants analyzed by SDS-PAGE indicated  
 45 in Fig. 5A. C) The protein concentrations calculated from SDS-PAGE analysis and the total protein  
 46 concentrations of culture supernatants measured by Bradford assay with BSA as a standard. The  
 47 protein concentrations estimated by Bradford assay well reflect that estimated from SDS-PAGE  
 48 analysis at the higher protein concentrations, while the correlation at low productivity level is  
 49 ambiguous. The concentrations of some crude enzymes were underestimated in Bradford assay  
 50 compared with SDS-PAGE (circled by blue).
